# Supplementary material for: The role of soft colloidal templates in the shape evolution of flower-like MgAl-LDH hierarchical microstructures
Source: Royal Society of Chemistry journal article supplement (doi:10.1039/c5ra01561h), 2015-01-01
Supplement: c5ra01561h1.pdf [file c5ra01561h1.pdf]

## Supplementary Information

### **The role of soft colloidal templates in shape evolution of flower-like MgAl-LDH hierarchical microstructures**

Jie Zhang <sup>a</sup>, Xiangli Xie <sup>b</sup>, Cunjun Li <sup>a</sup>, Hai Wang <sup>c</sup>, Linjiang Wang <sup>c\*</sup>

<sup>a</sup>College of Materials Science and Engineering, Guilin University of Technology, Guilin 541004, PR

China

<sup>b</sup>College of Chemistry and Bioengineering, Guilin University of Technology, Guilin 541004, PR

China

<sup>c</sup>Key Laboratory of New Processing Technology for Nonferrous Metals and Materials, Ministry of Education, Guilin University

of Technology, Guilin 541004, PR China

Corresponding author E-mail address: wlinjiang@163.com (L.J. Wang).

Tel.: +86 13507736656; fax: +86 7735896035.

## Figure captions

**Fig. S1.** XRD patterns of MgAl-SDS-LDH synthesized at 160 °C for 6 h with different concentration of SDS: (a) 0.005 mol L<sup>-1</sup>, (b) 0.02 mol L<sup>-1</sup>, (c) 0.04 mol L<sup>-1</sup>, and (d) 0.06 mol L<sup>-1</sup>.

**Fig. S2** XRD patterns of MgAl-SDS-LDH samples synthesized at 160 °C for different hydrothermal reaction time: (a) 1 h, (b) 3 h, (c) 6 h, and (d) 10 h.

**Fig. S3** XRD patterns of MgAl-SDS-LDH samples synthesized at different hydrothermal temperature for 6 h: (a and b) 100 °C, (c and d) 120 °C, (e and f) 140 °C, and (g and h) 160 °C.

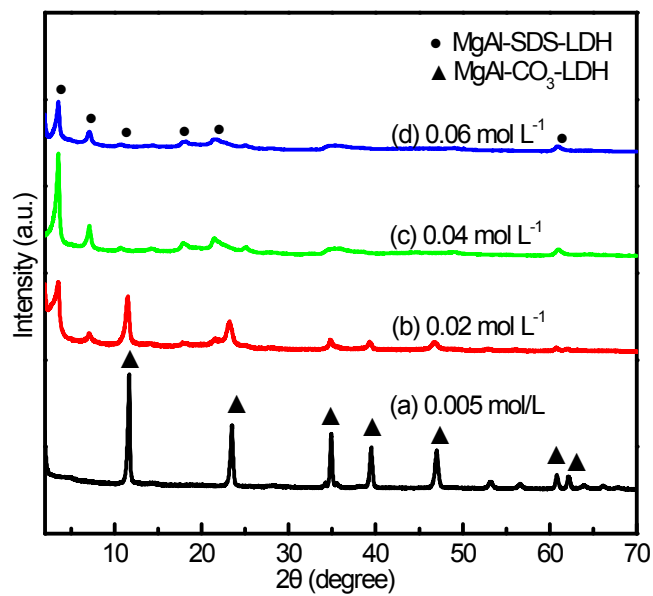

**Fig. S1** XRD patterns of MgAl-SDS-LDH synthesized at 160 °C for 6 h with different concentration of SDS: (a) 0.005 mol L<sup>-1</sup>, (b) 0.02 mol L<sup>-1</sup>, (c) 0.04 mol L<sup>-1</sup>, and (d) 0.06 mol L<sup>-1</sup>.

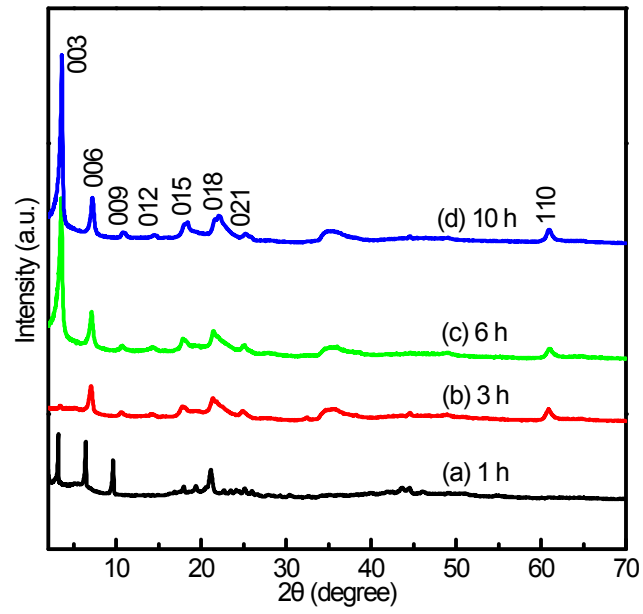

**Fig.S2** XRD patterns of MgAl-SDS-LDH samples synthesized at 160 °C for different hydrothermal reaction time: (a) 1 h, (b) 3 h, (c) 6 h, and (d) 10 h.

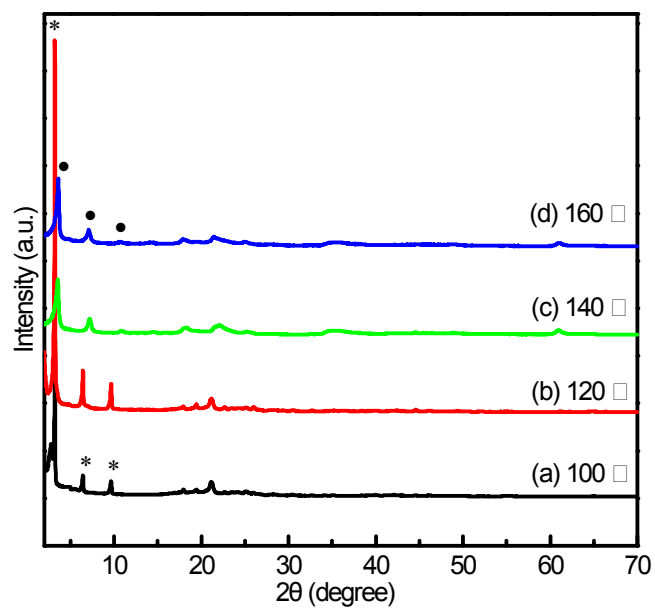

**Fig. S3** XRD patterns of MgAl-SDS-LDH samples synthesized at different hydrothermal temperature for 6 h: (a and b) 100 °C, (c and d) 120 °C, (e and f) 140 °C, and (g and h) 160 °C.
